# Supplementary material for: Lower risk of severe checkpoint inhibitor toxicity in more advanced disease
Source: PubMed Central journal article supplement — ESMO Open. 2020 Nov 16;5(6):e000945. doi: 10.1136/esmoopen-2020-000945 (PMC7670947; doi:10.1136/esmoopen-2020-000945), 2020-11-16
Supplement: esmoopen-2020-000945supp001.pdf [file esmoopen-2020-000945supp001.pdf]

**SUPPLEMENTARY MATERIAL**

## Lower risk of severe checkpoint inhibitor toxicity in more advanced disease

Results of the prospective Dutch Melanoma Treatment Registry

Verheijden RJ, et al.

**Supplementary table 1: Determinants of severe immune related adverse events in first-line anti-PD1 treated patients using both univariable and multivariable Poisson regression**

|                                     | Univariable analysis |           |         | Multivariable analysis |                       |         |
|-------------------------------------|----------------------|-----------|---------|------------------------|-----------------------|---------|
|                                     | RR                   | 95% CI    | p-value | RR <sub>adj</sub>      | 95% CI <sub>adj</sub> | p-value |
| <b>Age (years)</b>                  | 1.00                 | 0.99-1.02 | 0.710   | 1.00                   | 0.98-1.03             | 0.665   |
| <b>Sex</b>                          |                      |           |         |                        |                       |         |
| Male                                | ref                  |           |         | ref                    |                       |         |
| Female                              | 1.01                 | 0.64-1.59 | 0.947   | 1.02                   | 0.65-1.62             | 0.923   |
| <b>WHO performance status</b>       |                      |           |         |                        |                       |         |
| 0                                   | ref                  |           |         | ref                    |                       |         |
| 1                                   | 0.87                 | 0.51-1.44 | 0.610   | 1.01                   | 0.60-1.69             | 0.976   |
| ≥2                                  | 1.20                 | 0.36-2.95 | 0.723   | 1.37                   | 0.48-3.95             | 0.555   |
| <b>Number of comorbidities</b>      |                      |           |         |                        |                       |         |
| 0                                   | ref                  |           |         | ref                    |                       |         |
| 1-2                                 | 1.08                 | 0.66-1.82 | 0.763   | 0.98                   | 0.56-1.74             | 0.955   |
| ≥3                                  | 0.97                 | 0.48-1.87 | 0.929   | 0.89                   | 0.41-1.93             | 0.775   |
| <b>Stage of disease</b>             |                      |           |         |                        |                       |         |
| Unresectable stage III/<br>M1a/ M1b | ref                  |           |         | ref                    |                       |         |
| M1c/ M1d                            | 0.69                 | 0.44-1.09 | 0.108   | 0.73                   | 0.45-1.18             | 0.196   |
| <b>Number of metastatic sites</b>   |                      |           |         |                        |                       |         |
| <3                                  | ref                  |           |         | ref                    |                       |         |
| ≥3                                  | 0.91                 | 0.50-1.55 | 0.733   | 1.09                   | 0.64-1.85             | 0.761   |
| <b>LDH</b>                          |                      |           |         |                        |                       |         |
| ≤ ULN                               | ref                  |           |         | ref                    |                       |         |
| 1-2x ULN                            | 0.96                 | 0.57-1.57 | 0.879   | 1.06                   | 0.63-1.78             | 0.840   |
| >2x ULN                             | 0.52                 | 0.09-1.69 | 0.372   | 0.71                   | 0.17-3.00             | 0.636   |

RR: risk ratio; RR<sub>adj</sub>: adjusted risk ratio; CI: confidence interval; CI<sub>adj</sub>: adjusted confidence interval; WHO: World Health Organisation; LDH: lactate dehydrogenase; ULN: upper limit of normal (defined as 250U/L); the multivariable analysis was additionally adjusted for follow-up time.
